# Supplementary material
Source: Springer Nature journal article supplement (https://www.springermedizin.de/resource/supplementary/12958_2012_1057_MOESM3_ESM.pdf/9566826)

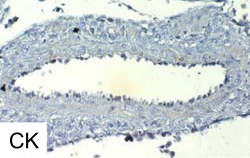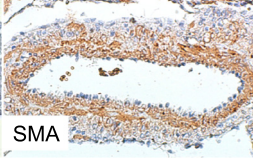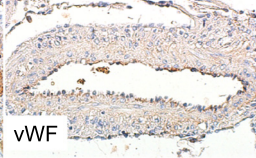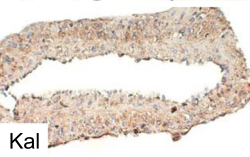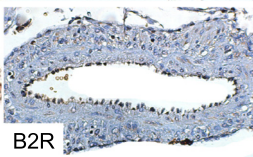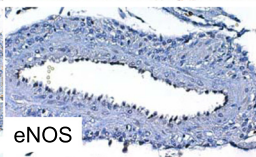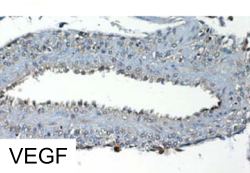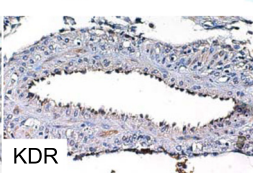

Supplement: MOESM3 [file 9566826]
